# Supplementary material for: A metal ion-regulated colorimetric sensor array: discriminating Chinese Baijiu from other beverages
Source: Royal Society of Chemistry journal article supplement (doi:10.1039/c9ay01804b), 2019-01-01
Supplement: c9ay01804b1.pdf [file c9ay01804b1.pdf]

## Supporting Information

Table.S1 Details of reagent

| Reagent                             | Information                              | Production                                  |
|-------------------------------------|------------------------------------------|---------------------------------------------|
| Sodium citrate dihydrate            | $C_6H_5Na_3O_7 \cdot 2H_2O, \geq 99.0\%$ | Aladdin Industrial Inc                      |
| Silver nitrate                      | $AgNO_3, \geq 99.0\%$                    | Aladdin Industrial Inc                      |
| Polyvinylpyrrolidone                | PVP, MW:58000                            | Aladdin Industrial Inc                      |
| Caustic Soda                        | $H_2O_2,$                                | Chengdu Kelong Chemical co., Ltd            |
| Sodium Borohydride                  | $NaBH_4, 98\%$                           | Adamas Reagent Co.,Ltd                      |
| Cadmium Chloride                    | $CdCl_2 \cdot 2H_2O, 99.9\%$             | Taitan Science technology Co. Ltd           |
| Aluminum chloride hexahydrate       | $AlCl_3 \cdot 6H_2O, 99.99\%$            | Adamas Reagent Co.,Ltd                      |
| Iron(II) Chlorid                    | $FeCl_2, 99.5\%$                         | Adamas Reagent Co.,Ltd                      |
| Iron chloride hexahydrate           | $FeCl_3, AR$                             | Adamas Reagent Co.,Ltd                      |
| Chromium chloride hexahydrate       | $CrCl_3, 98\%$                           | Adamas Reagent Co.,Ltd                      |
| Potassium Dichromate                | $K_2Cr_2O_7, 99.5\%$                     | Taitan Science technology Co. Ltd           |
| Manganese(II) Chloride Tetrahydrate | $MnCl_2, 99\%$                           | Taitan Science technology Co. Ltd           |
| Potassium Permanganate              | $KMnO_4, 99.5\%$                         | Taitan Science technology Co. Ltd           |
| Alcohol                             | 99.70%                                   | Chongqing Chuandong Chemical Group Co., Ltd |

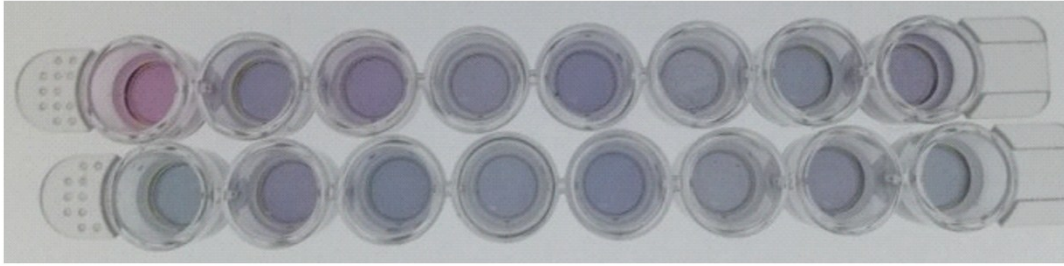

**Fig.S1 The mixture of 16 Baijiu with Au NPs**
